# Supplementary material
Source: MDPI journal article supplement (https://www.mdpi.com/2075-4701/11/6/977)
Supplement: s1 [file s1]

## Supplementary Materials

# Electrochemistry, Electrodeposition and Photoluminescence of Eu (III)/Lanthanides (III) on Terpyridine-Functionalized Ti Nanospikes

Min Hee Joo <sup>1,2</sup>, So Jeong Park <sup>1</sup>, Hye Ji Jang <sup>1</sup>, Sung-Min Hong <sup>1,2</sup>, Choong Kyun Rhee <sup>1</sup> and Youngku Sohn <sup>1,2,\*</sup>

<sup>1</sup> Department of Chemistry, Chungnam National University, Daejeon 34134, Korea; 202050113@o.cnu.ac.kr (M.-H.J.); jsjs5921@naver.com (S.-J.P.); gpwl9325@o.cnu.ac.kr (H.-J.J.) qwqe212@o.cnu.ac.kr (S.-M.H.); ckrhee@cnu.ac.kr (C.-K.R.)

<sup>2</sup> Department of Chemical Engineering and Applied Chemistry, Chungnam National University, Daejeon 34134, Korea

\* Correspondence: youngkusohn@cnu.ac.kr; Tel.: +82-42-821-6548

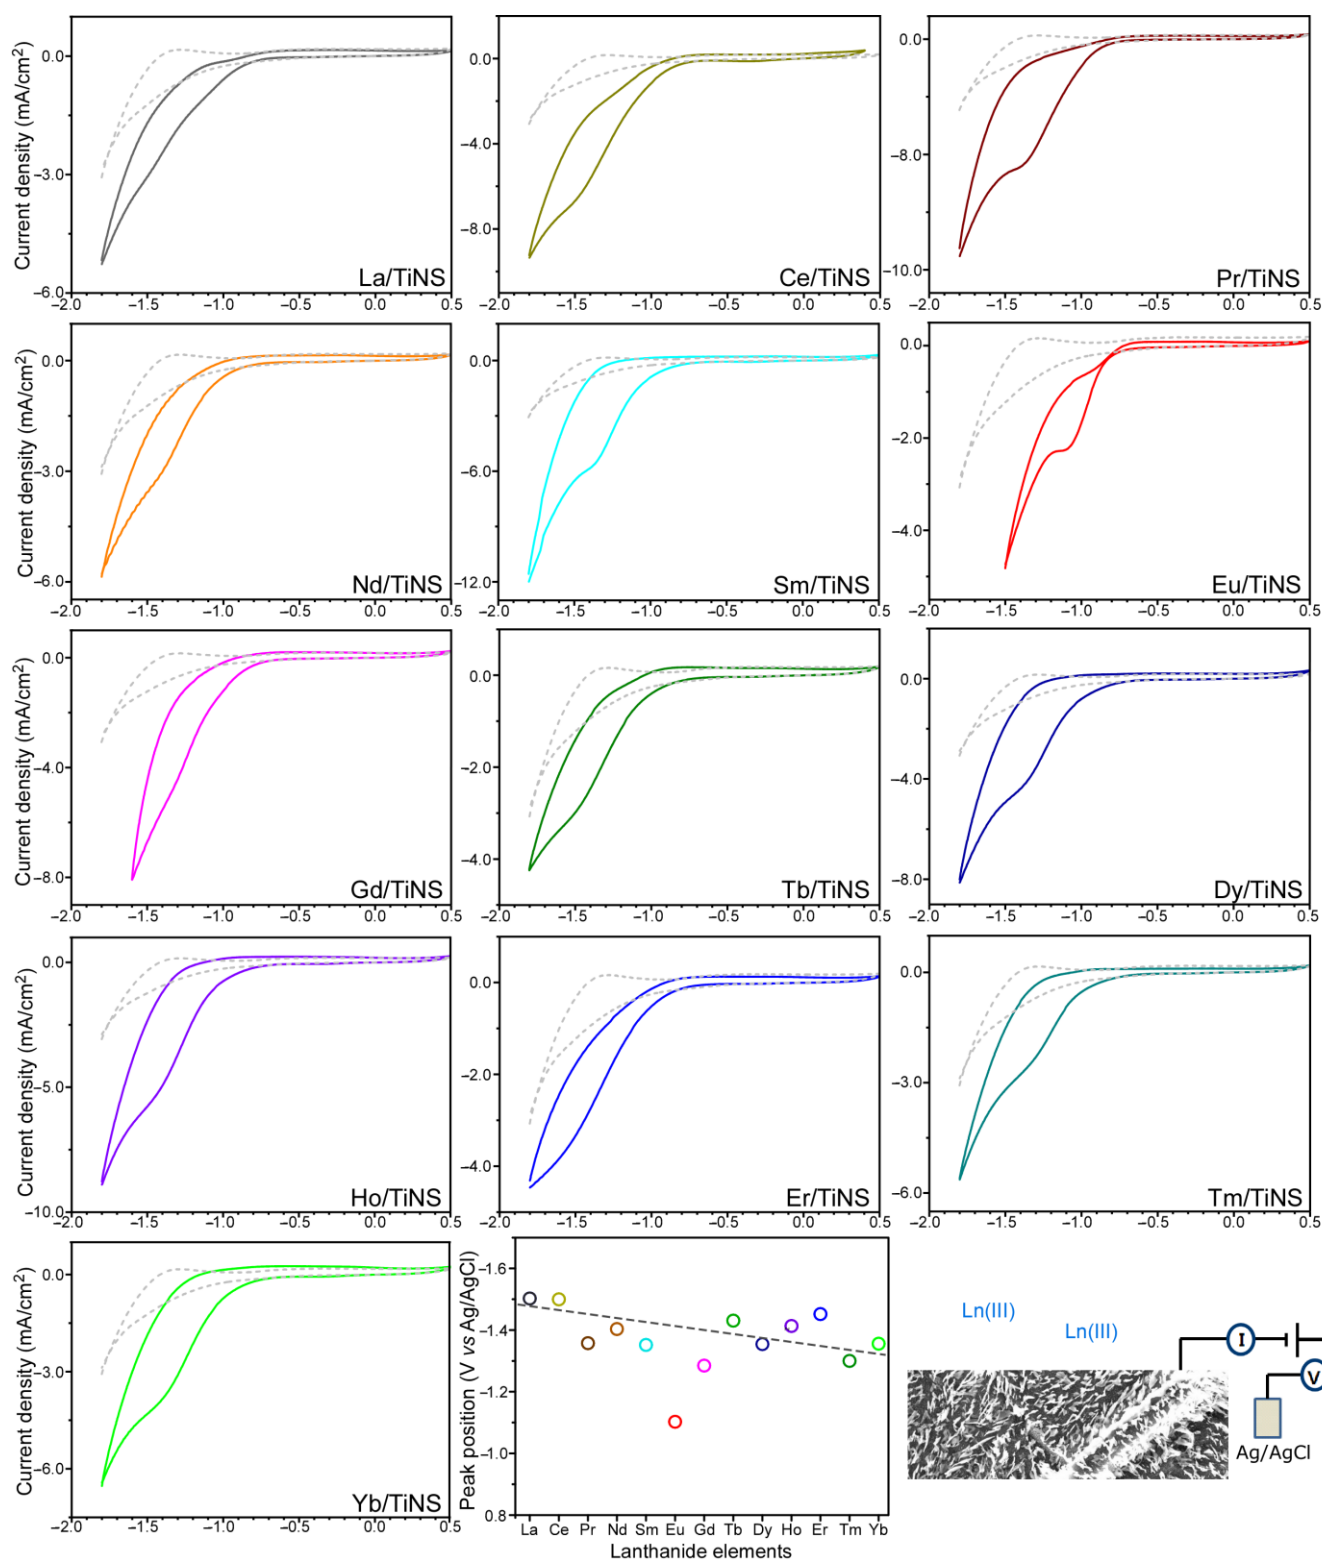

**Figure S1.** Cyclic voltammetry profiles in a 10 mM Ln (III)/0.1 M NaClO<sub>4</sub> electrolyte over bare TiNS electrodes at a scan rate of 0.2 V·sec<sup>-1</sup> and a schematic of a three-electrode system.

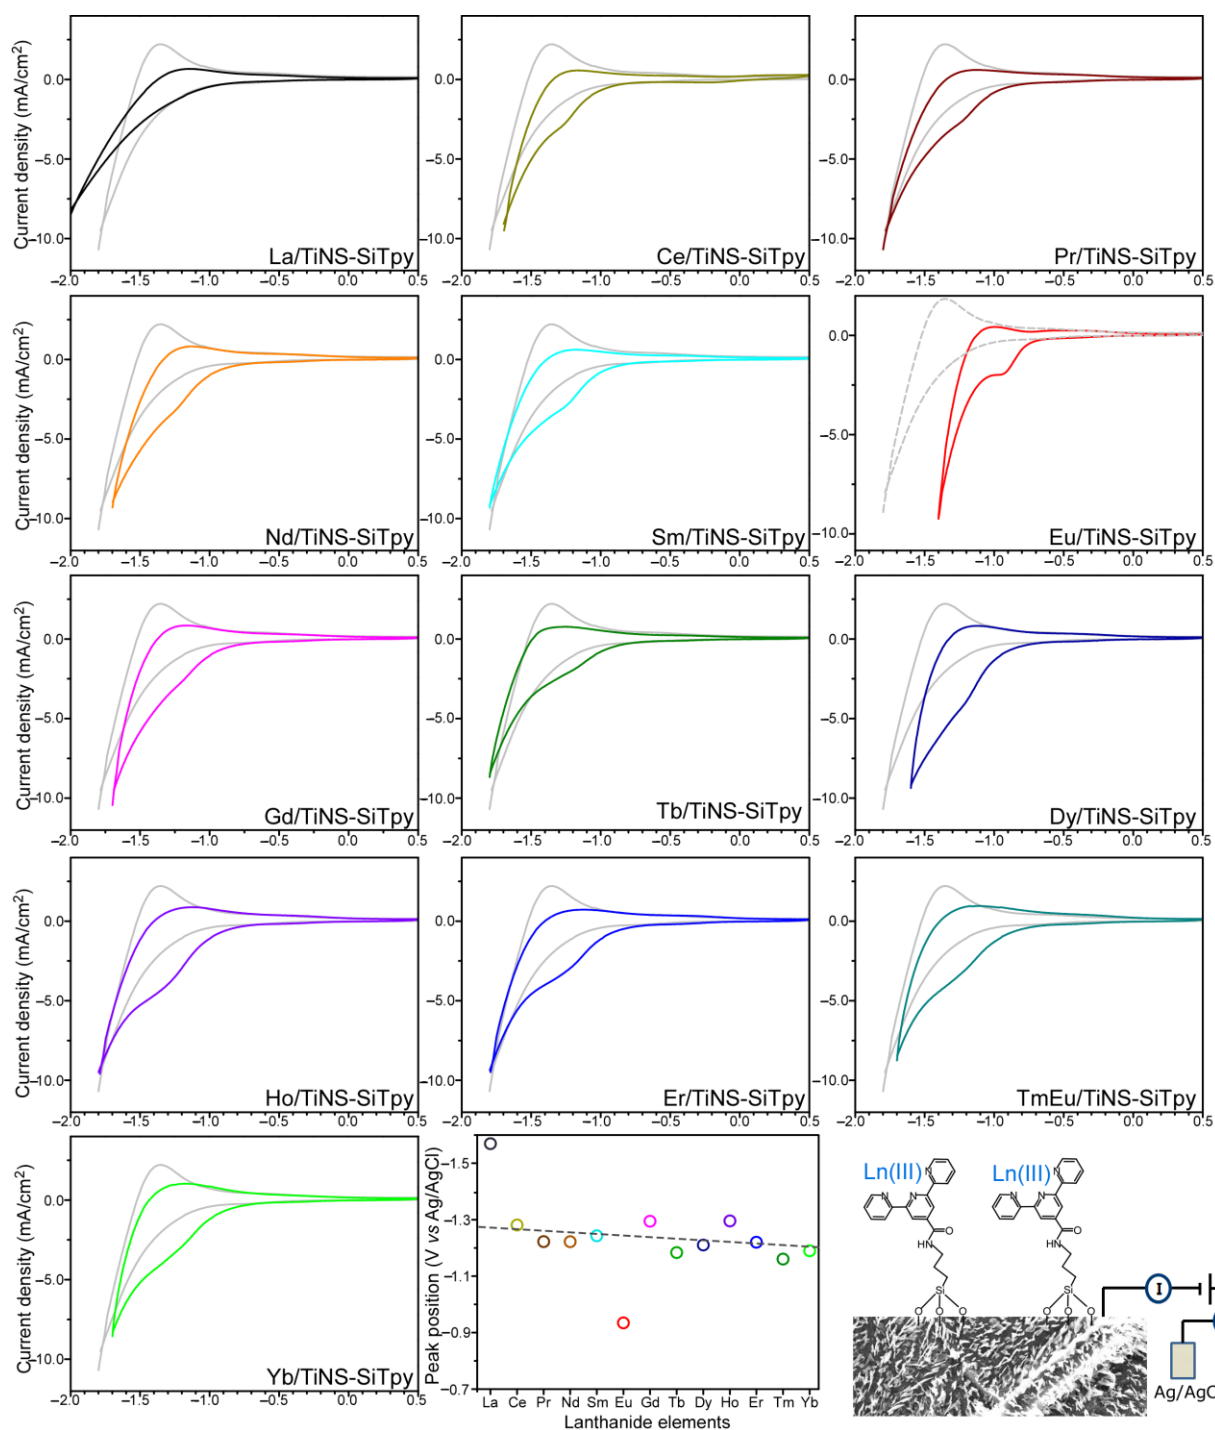

**Figure S2.** Cyclic voltammetry profiles in a 10 mM Ln (III)/0.1 M NaClO<sub>4</sub> electrolyte over TiNS-SiTpy electrodes at a scan rate of 0.2 V · sec<sup>-1</sup> and a schematic of a three-electrode system.



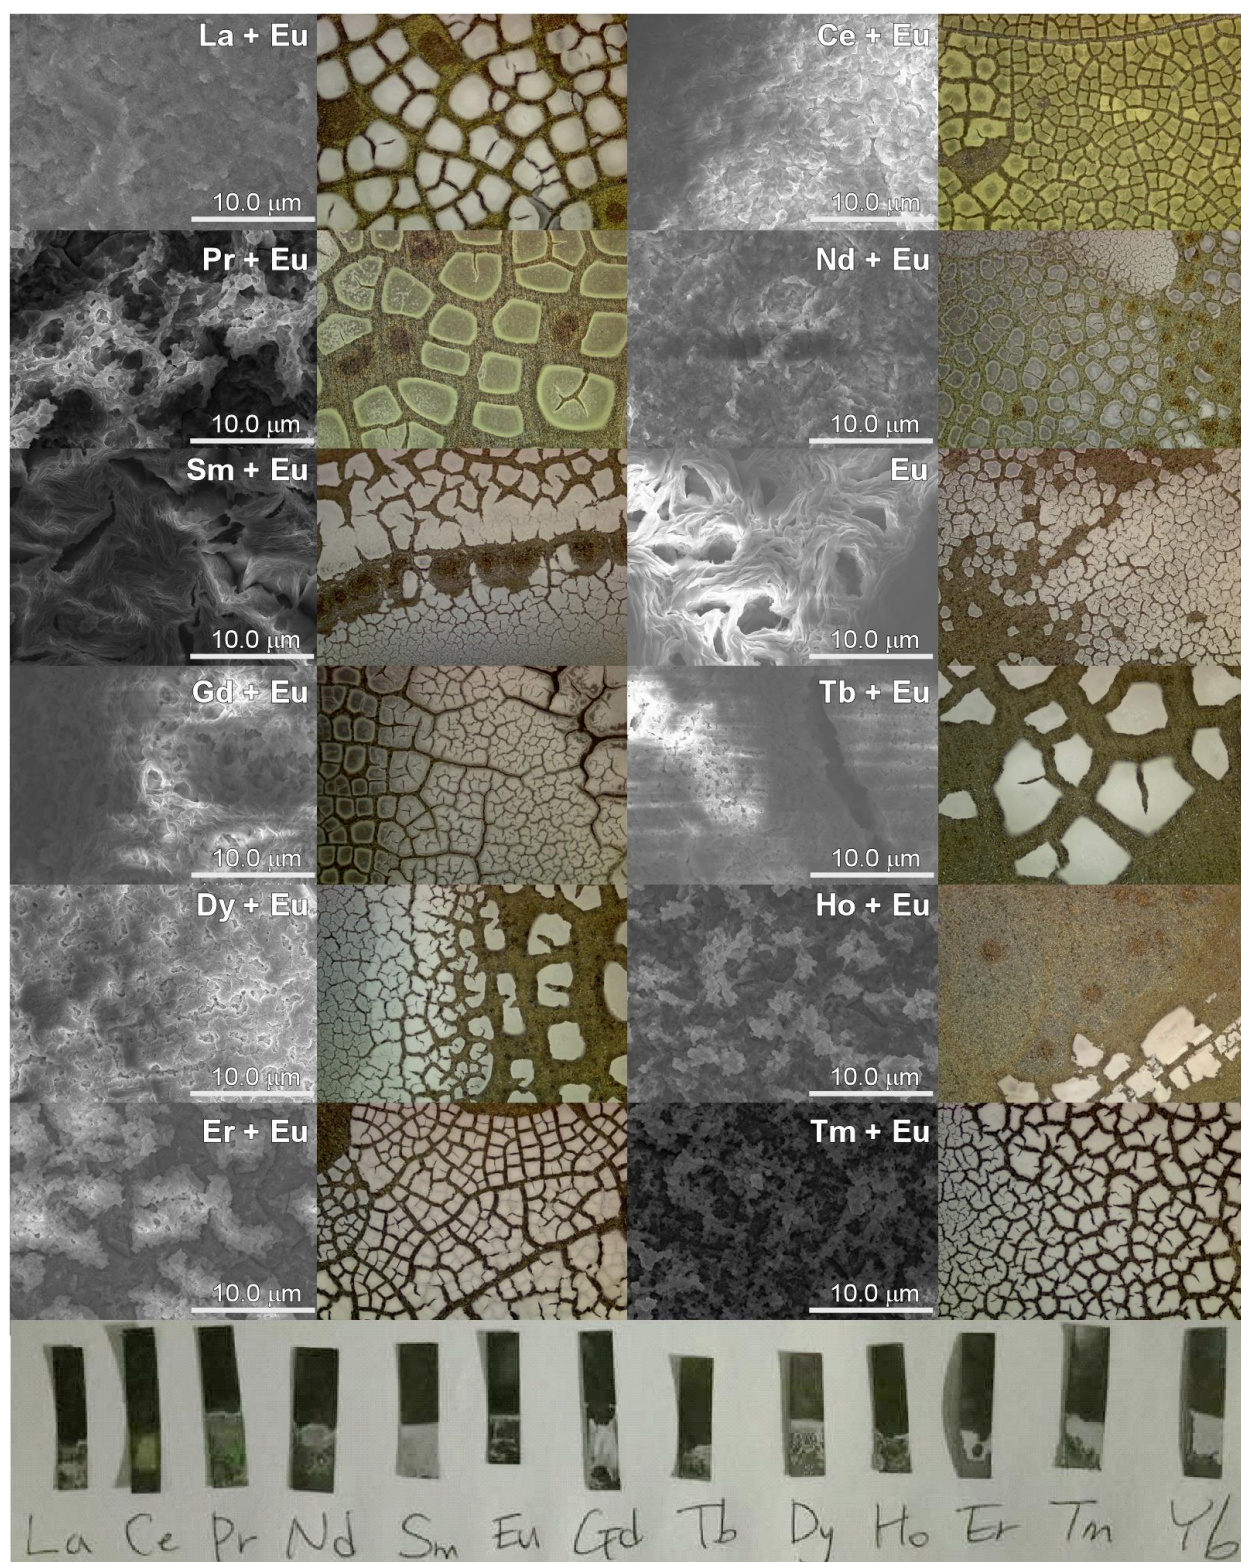

**Figure S3.** SEM (scanning electron microscope) and the corresponding optical microscope (300 $\times$ ) images of electrodeposited mixed Ln over TiNS-SiTpy electrodes in a 5 mM Eu (III) + 5 mM Ln (III)/0.1 M NaClO<sub>4</sub> electrolyte, and the photos (bottom panel) of the corresponding electrode samples.



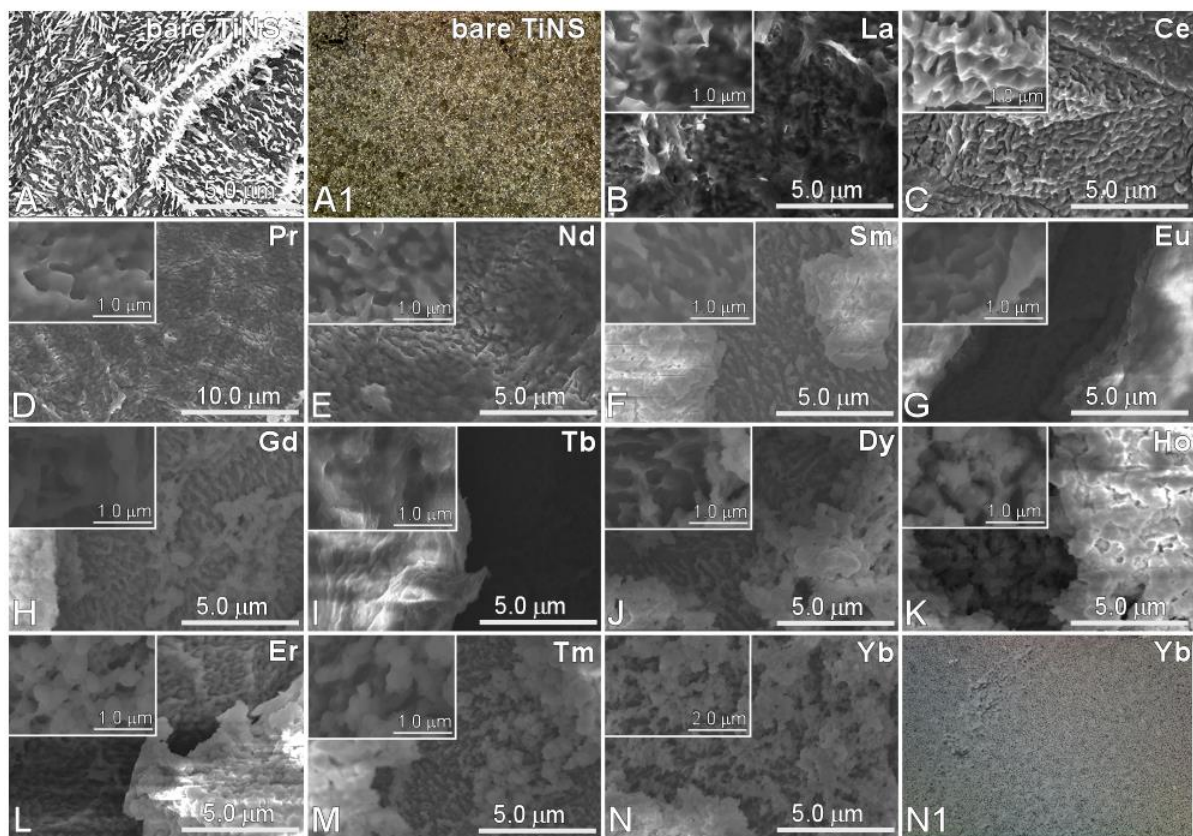

**Figure S4a.** SEM (A–N) and the corresponding optical microscope (300×) images (A and N1) of electrodeposited Ln over TiNS electrodes in a 10 mM Ln (III)/0.1 M NaClO<sub>4</sub> electrolyte. Insets show the magnified image of the corresponding SEM image.

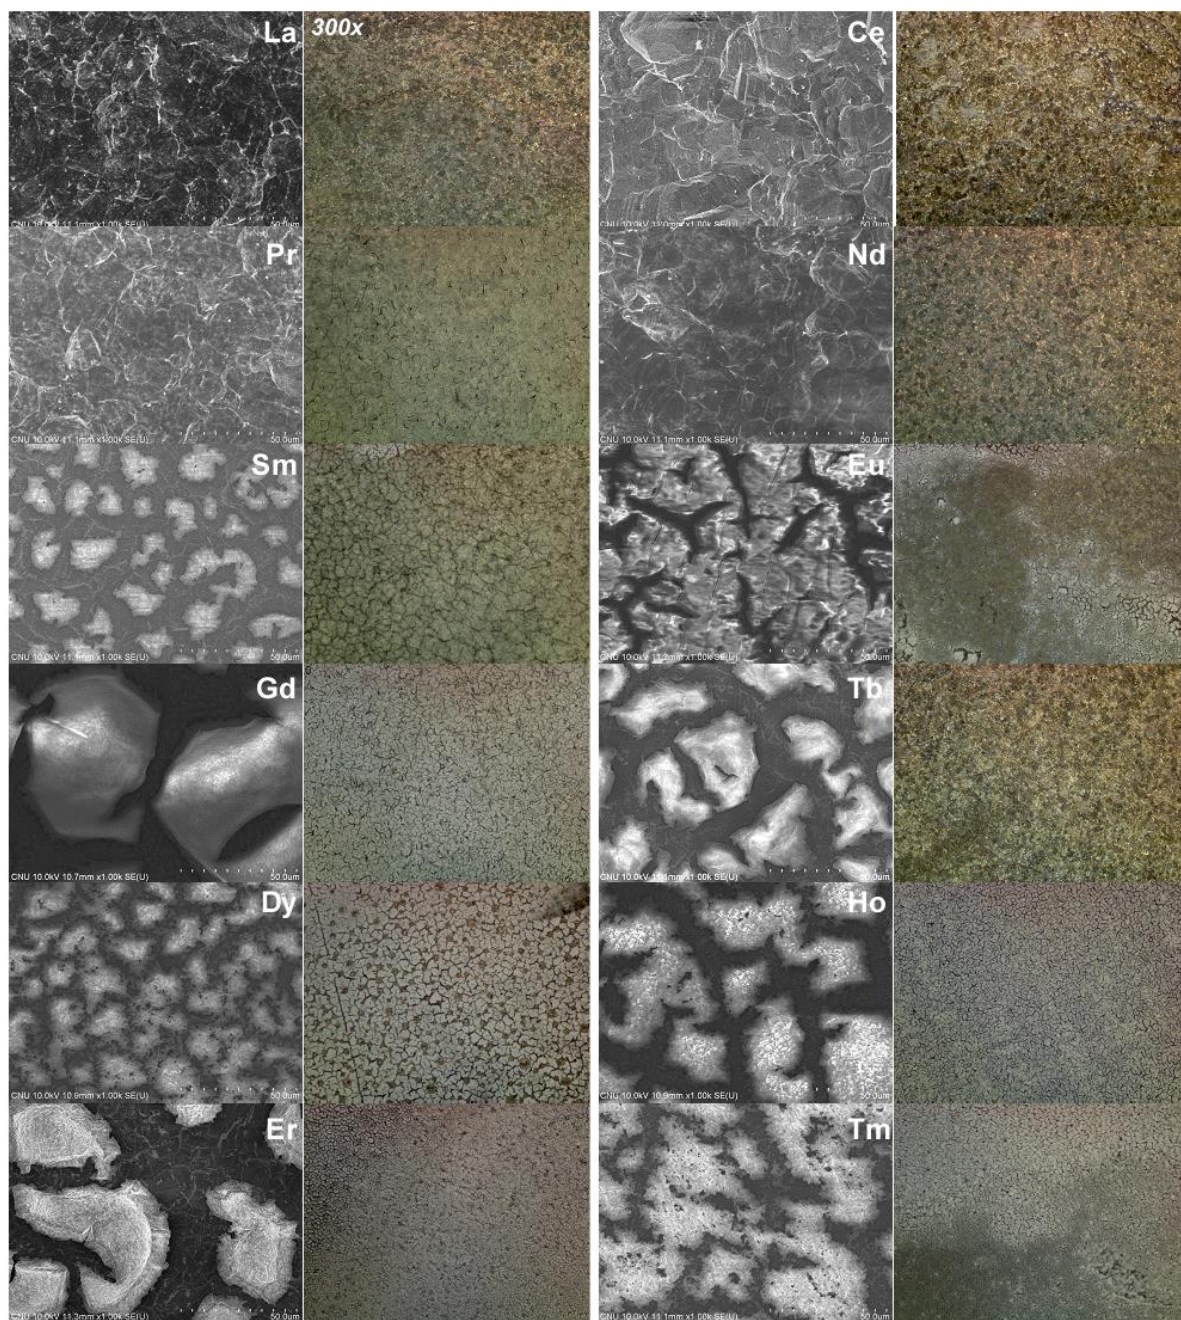

**Figure S4b.** SEM and the corresponding optical microscope (300×) images of electrodeposited Ln over TiNS electrodes in a 10 mM Ln (III)/0.1 M NaClO<sub>4</sub> electrolyte.

**Table S1.** EDXS (energy dispersive X-ray spectroscopy) elemental atomic composition ratios (%).

|    | Eu    | Gd + Eu | Tb +Eu |
|----|-------|---------|--------|
| N  | 8.09  | 7.48    | 5.72   |
| O  | 68.92 | 77.14   | 72.8   |
| Na | 0.38  | 0.2     | 0.28   |
| Cl | 3.78  | 3.18    | 1.84   |
| Eu | 18.82 | 6.34    | 10.96  |
| Gd | -     | 5.66    | -      |
| Tb | -     | -       | 8.41   |
